# Supplementary material for: Elastin-like polypeptide coacervates as reversibly triggerable compartments for synthetic cells
Source: PubMed Central journal article supplement (PMC11374812; doi:10.1038/s42004-024-01270-8), 2024-09-04
Supplement: 42004_2024_1270_MOESM1_ESM.pdf [file 42004_2024_1270_MOESM1_ESM.pdf]

## Supplementary Information

### **Elastin-Like Polypeptide Coacervates as Reversibly Triggerable Compartments for Synthetic Cells**

Chang Chen<sup>1</sup>, Ketan A. Ganar<sup>1</sup>, Robbert J. de Haas<sup>1</sup>, Nele Jarnot<sup>1</sup>, Erwin Hogeveen<sup>1</sup>, Renko de Vries<sup>1</sup>,  
Siddharth Deshpande<sup>1§</sup>

<sup>1</sup>Laboratory of Physical Chemistry and Soft Matter, Wageningen University and Research, Stippeneng  
4, 6708 WE Wageningen, The Netherlands

§ corresponding author; email: [siddharth.deshpande@wur.nl](mailto:siddharth.deshpande@wur.nl)

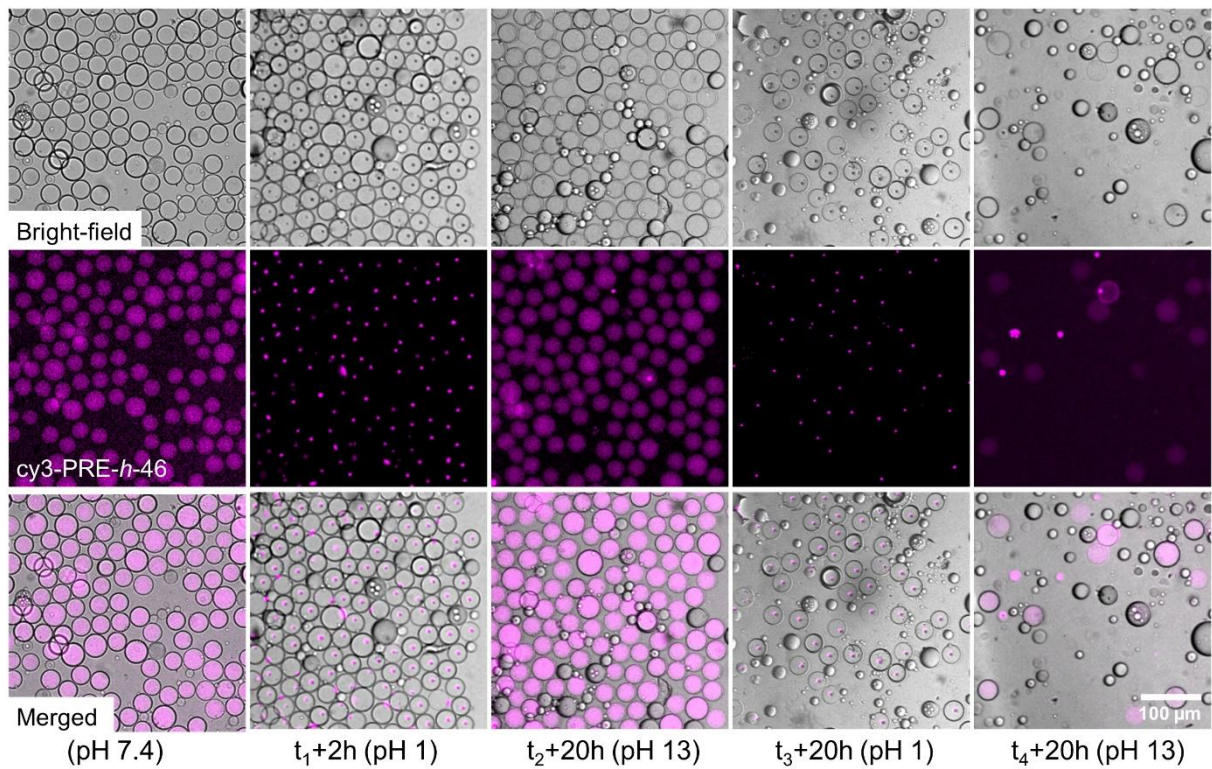

**Supplementary Figure 1. pH-triggered two consecutive EMO formation-dissolution cycles within DEs.**

Representative bright-field, fluorescence, and merged images of several DEs showing two pH-triggered EMO formation-dissolution cycles;  $t_1$ ,  $t_2$ ,  $t_3$ , and  $t_4$  correspond to the time points of adding pH 1 feed (first cycle), pH 13 feed (first cycle), pH 1 feed (second cycle), and pH 13 feed (second cycle) respectively.

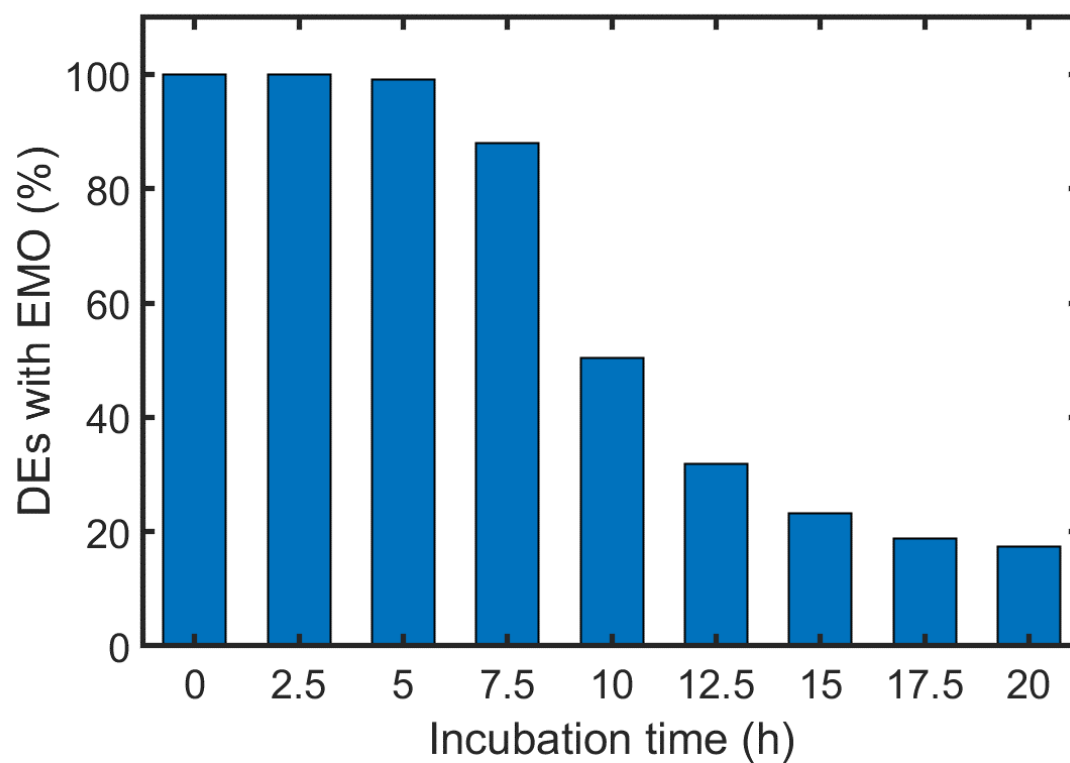

**Supplementary Figure 2. pH-triggered dissolution of EMOs over time.** Percentage of DEs containing EMOs at different time points upon pH 13 trigger ( $n > 300$  for each time point). A steep decrease in EMOs can be seen after 7.5 hours.
