# Supplementary material for: Elastin-like polypeptide coacervates as reversibly triggerable compartments for synthetic cells
Source: PubMed Central journal article supplement (PMC11374812; doi:10.1038/s42004-024-01270-8), 2024-09-04
Supplement: 42004_2024_1270_MOESM2_ESM.pdf [file 42004_2024_1270_MOESM2_ESM.pdf]

# Description of Additional Supplementary Files

**File name: Supplementary Data 1**

**Description:** Design file for the double emulsion production.

**File name: Supplementary Data 2**

**Description:** Design file for double emulsion trapping and stimulation.

**File name: Supplementary Data 3**

**Description:** Analysis code used for image processing.

**File name: Supplementary Data 4**

**Description:** Data underlying the figures in the main article and its supplementary information.

**File name: Supplementary Movie 1**

**Description:** Bright-field video showing on-chip high-throughput DE production.

**File name: Supplementary Movie 2**

**Description:** Fluorescence video showing efficient encapsulation of ELPs during on-chip DE production. The inner aqueous phase contained 25  $\mu\text{M}$  PRE-h-46 (with 4 mol% cy3-PRE-h-46 for fluorescence visualization).

**File name: Supplementary Movie 3**

**Description:** Fluorescence video showing efficient adjustment and quick response of the DAW junction. Inlet 2 pressure was kept at 20 mbar whereas the inlet 1 pressure was increased from 10 to 40 mbar in steps of 5 mbar, and finally returned to 20 mbar.

**File name: Supplementary Movie 4**

**Description:** Bright-field (above) and fluorescence (below) channels showing four consecutive EMO formation-dissolution cycles within trapped DEs in response to repeated osmotic changes. The DEs contained 25  $\mu$ M PRE-h-46 (with 4 mol% cy3-PRE-h-46 for fluorescence visualization).
